# Supplementary material
Source: MDPI journal article supplement (https://www.mdpi.com/2311-7524/10/5/464)
Supplement: s1 [file s1]

Table S2. The selective pressure of peanut chloroplast gene using codeml.

| Gene categories                     | Gene         | dn     | ds     | dn/ds   | ts/tv   |
|-------------------------------------|--------------|--------|--------|---------|---------|
| Photosystem I                       | <i>psaA</i>  | 0.0009 | 0.0078 | 0.11738 | 4.26905 |
|                                     | <i>psaB</i>  | 0.0000 | 0.0049 | 0.00010 | 1.09968 |
|                                     | <i>psaC</i>  | 0.0000 | 0.0002 | 0.00010 | 0.00010 |
|                                     | <i>psaI</i>  | 0.0000 | 0.0001 | 0.29236 | 2.03338 |
|                                     | <i>psaJ</i>  | 0.0000 | 0.0001 | 0.39110 | 1.99922 |
| Photosystem II                      | <i>psbA</i>  | 0.0000 | 0.0276 | 0.00010 | 2.19588 |
|                                     | <i>psbC</i>  | 0.0000 | 0.0002 | 0.00010 | 0.00010 |
|                                     | <i>psbE</i>  | 0.0000 | 0.0001 | 0.08281 | 1.51375 |
|                                     | <i>psbF</i>  | 0.0000 | 0.0001 | 0.19840 | 2.03057 |
|                                     | <i>psbH</i>  | 0.0000 | 0.0001 | 0.14205 | 2.08796 |
|                                     | <i>psbI</i>  | 0.0000 | 0.0001 | 0.00010 | 1.74915 |
|                                     | <i>psbJ</i>  | 0.0000 | 0.0001 | 0.52203 | 2.06485 |
|                                     | <i>psbK</i>  | 0.0000 | 0.0002 | 0.00010 | 0.00010 |
|                                     | <i>psbL</i>  | 0.0000 | 0.0001 | 0.13514 | 1.87574 |
|                                     | <i>psbM</i>  | 0.0000 | 0.0001 | 0.00010 | 1.26601 |
|                                     | <i>psbN</i>  | 0.0000 | 0.0001 | 0.27056 | 1.97383 |
|                                     | <i>psbZ</i>  | 0.0000 | 0.0001 | 0.39998 | 2.00000 |
| RuBisCO large subunit               | <i>rbcL</i>  | 0.0000 | 0.0028 | 0.00010 | 304.712 |
| Cytochrome b/f complex              | <i>petB</i>  | 0.0000 | 0.0088 | 0.00010 | 0.00010 |
|                                     | <i>petD</i>  | 0.0028 | 0.0208 | 0.13444 | 646.080 |
|                                     | <i>petG</i>  | 0.0000 | 0.0605 | 0.00010 | 0.00010 |
| c-type cytochrome                   | <i>ccsA</i>  | 0.0036 | 0.0075 | 0.48371 | 0.00010 |
| ATP synthase                        | <i>atpB</i>  | 0.0000 | 0.0002 | 0.00010 | 0.00010 |
|                                     | <i>atpE</i>  | 0.0000 | 0.0001 | 0.18572 | 1.75995 |
|                                     | <i>atpF</i>  | 0.1716 | 0.5252 | 0.32675 | 0.64903 |
|                                     | <i>atpI</i>  | 0.0000 | 0.0123 | 0.00010 | 1.25983 |
| NADH dehydrogenase                  | <i>ndhA</i>  | 0.0047 | 0.0091 | 0.51982 | 0.94759 |
|                                     | <i>ndhB</i>  | 0.1541 | 0.2653 | 0.58095 | 0.94584 |
|                                     | <i>ndhC</i>  | 0.0036 | 0.0270 | 0.13434 | 3.51268 |
|                                     | <i>ndhD</i>  | 0.0000 | 0.0068 | 0.00010 | 1.10592 |
|                                     | <i>ndhF</i>  | 0.0057 | 0.0217 | 0.26054 | 1.16489 |
|                                     | <i>ndhH</i>  | 0.0021 | 0.0050 | 0.41775 | 0.92841 |
|                                     | <i>ndhI</i>  | 0.0000 | 0.0001 | 0.33657 | 2.00128 |
|                                     | <i>ndhJ</i>  | 0.0000 | 0.0002 | 0.00010 | 0.59237 |
|                                     | <i>ndhK</i>  | 4.1292 | 8.6219 | 0.47892 | 1.58000 |
| Assembly/stability of photosystem I | <i>ycf3</i>  | 0.0500 | 0.2265 | 0.22082 | 0.48335 |
|                                     | <i>ycf4</i>  | 0.0047 | 0.0180 | 0.26276 | 1.71848 |
| RNA polymerase genes                | <i>rpoA</i>  | 0.0052 | 0.0107 | 0.47980 | 1.86694 |
|                                     | <i>rpoB</i>  | 0.0012 | 0.0048 | 0.25119 | 1.61900 |
|                                     | <i>rpoCl</i> | 0.0371 | 0.0976 | 0.38038 | 1.36740 |

|                                      |              |        |        |         |         |
|--------------------------------------|--------------|--------|--------|---------|---------|
|                                      | <i>rpoC2</i> | 0.0140 | 0.0156 | 0.89652 | 0.67955 |
|                                      | <i>rpl2</i>  | 0.0563 | 0.0612 | 0.92049 | 2.67673 |
|                                      | <i>rpl23</i> | 0.0000 | 0.0001 | 0.04132 | 2.60832 |
|                                      | <i>rpl32</i> | 0.0000 | 0.0002 | 0.00010 | 0.00010 |
| Ribosomal protein                    | <i>rpl33</i> | 0.0000 | 0.0001 | 0.46871 | 0.00010 |
|                                      | <i>rps8</i>  | 0.0033 | 0.0118 | 0.28020 | 1.84263 |
|                                      | <i>rps14</i> | 0.0000 | 0.0002 | 0.00010 | 1.40338 |
|                                      | <i>rps18</i> | 0.0000 | 0.0000 | 650.584 | 606.459 |
| Acetyl-CoA<br>carboxylase<br>subunit | <i>accD</i>  | 0.0049 | 0.0000 | 146.010 | 1.22978 |
| Proteolysis<br>subunit               | <i>clpP</i>  | 0.0364 | 0.0314 | 1.16086 | 0.12456 |
| Carbon<br>metabolism                 | <i>cemA</i>  | 0.0000 | 0.0001 | 0.00010 | 2.34633 |
| Conserved reading<br>frames          | <i>ycf1</i>  | 0.0213 | 0.0180 | 1.18700 | 1.06362 |
|                                      | <i>ycf2</i>  | 0.0017 | 0.0042 | 0.40000 | 1.99999 |
